# Supplementary material
Source: PubMed Central journal article supplement (PMC6610879)
Supplement: NIHMS1526640-supplement-10439_2019_2261_MOESM1_ESM.pdf [file NIHMS1526640-supplement-10439_2019_2261_MOESM1_ESM.pdf]

## INDICES FOR AAA GEOMETRY QUANTIFICATION

### One-Dimensional (1D) Size Indices

All diameter measurements were computed according to the hydraulic diameter definition:

$$D = \frac{4 * \text{Area}}{\text{Perimeter}}$$

$D_{\max}$ : Maximum transverse diameter of the AAA sac (in mm)

$D_{\text{ave}}$ : Average transverse diameter of the AAA (in mm)

$D_{\min}$ : Minimum transverse diameter of the AAA (in mm)

$D_{\text{neck,p}}$ : Proximal neck diameter immediately below the renal arteries (in mm)

$D_{\text{neck,d}}$ : Distal neck diameter (in mm)

H: Height of AAA (in mm)

L: Centerline length of AAA (in mm)

$H_{\text{neck}}$ : Height of AAA neck (in mm)

$L_{\text{neck}}$ : Centerline length of AAA neck (in mm)

$H_{\text{sac}}$ : Height of AAA sac (in mm)

$L_{\text{sac}}$ : Centerline length of AAA sac (in mm)

$H_b$ : Bulge height (in mm)

$d_c$ : Distance between the lumen centroid and the centroid of the cross section where  $D_{\max}$  is located (in mm)

$d_{c,\max}$ : The maximum distance between the lumen centroid and the centroid of the cross section along the central line (in mm)

## Wall Thickness Indices

TH<sub>min</sub>: minimum wall thickness (in mm)

TH<sub>max</sub>: maximum wall thickness (in mm)

TH<sub>ave</sub>: average wall thickness (in mm)

TH<sub>Dmax</sub>: average wall thickness where D<sub>max</sub> is located (in mm)

TH<sub>mode</sub>: mode of the wall thickness (in mm)

TH<sub>median</sub>: median of the wall thickness (in mm)

TH<sub>minvar</sub>: minimum variance of wall thickness

TH<sub>maxvar</sub>: maximum variance of wall thickness

TH<sub>medianvar</sub>: median variance of wall thickness

TH<sub>modevar</sub>: mode variance of wall thickness

TH<sub>meanvar</sub>: mean variance of wall thickness

P<sub>below</sub>: percentage of thickness below the average thickness (in %)

P<sub>above</sub>: percentage of thickness above the average thickness (in %)

## 2D Shape Indices

DHr: Diameter-Height ratio; DHr is an expression of the fusiform shape of the AAA sac,

$$DHr = \frac{D_{max}}{H}$$

DDr: Diameter-Diameter ratio

$$DDr = \frac{D_{max}}{D_{neck,p}}$$

Hr: Height ratio; Hr is an assessment of the relative neck height in comparison with the AAA height,

$$Hr = \frac{H_{neck}}{H}$$

BL: Bulge Location; BL provides a measure of the relative position of the maximum transverse dimension with respect to the neck,

$$BL = \frac{H_b}{H}$$

$\beta$ : Asymmetry factor

$$\beta = 1 - \frac{d_c}{D_{max}}$$

$\beta_{min}$ : Minimum asymmetry factor along the central line

$$\beta_{min} = \min\left(1 - \frac{d_{c,all}}{D}\right)$$

where  $d_{c,all}$  is distance between the lumen centroid and the centroid of the cross section along the central line, and  $D$  is the hydraulic diameter at the same cross section

T: Tortuosity

$$T = \frac{L}{d}$$

where  $d$  is the Euclidean distance from the centroid of the cross section where  $D_{neck,p}$  is located to the centroid of the cross section at the AAA distal end.

$C_{ave}$ : average lumen compactness

$C_{min}$ : minimum lumen compactness

$C_{max}$ : maximum lumen compactness

where compactness is defined as:

$$C = \frac{\text{Perimeter}^2}{4 * \pi * \text{Area}}$$

### 3D Size Indices

V: Vessel volume (in  $\text{mm}^3$ )

S: Vessel surface area (in  $\text{mm}^2$ )

### 3D Shape Indices

IPR: isoperimetric ratio

$$\text{IPR} = \frac{S}{V^{2/3}}$$

NFI: non-fusiform index

$$\text{NFI} = \frac{\frac{S}{V^{2/3}}}{\frac{S_{\text{fusiform}}}{V_{\text{fusiform}}^{2/3}}} = \frac{\text{IPR}}{\text{IPR}_{\text{fusiform}}}$$

### Second Order Curvature Based Indices

GAA: Area averaged Gaussian curvature (in  $\text{mm}^{-1}$ )

$$\text{GAA} = \frac{\sum_{\text{all elements}} K_j S_j}{\sum_{\text{all elements}} S_j}$$

MAA: Area averaged Mean curvature (in  $\text{mm}^{-2}$ )

$$\text{MAA} = \frac{\sum_{\text{all elements}} M_j S_j}{\sum_{\text{all elements}} S_j}$$

GLN: L2-norm of the Gaussian curvature

$$\text{GLN} = \frac{1}{4\pi} \sqrt{\sum_{\text{all elements}} S_j \cdot \sum_{\text{all elements}} (K_j^2 S_j)}$$

MLN: L2-norm of the Mean curvature

$$\text{MLN} = \frac{1}{4\pi} \sqrt{\sum_{\text{all elements}} (M_j^2 S_j)}$$
